# Supplementary material
Source: PubMed Central journal article supplement (PMC4096688)
Supplement: NIHMS596905-supplement-1.pdf [file NIHMS596905-supplement-1.pdf]

## Supplementary Tables

**Table S1. Hierarchy in the strength of NK cell education (adapted from <sup>1,2</sup>)**

| <b>KIR</b>           | <b>HLA</b>            | <b>Level of Response</b> |
|----------------------|-----------------------|--------------------------|
| 2DL3                 | Cw*07 (C1)            | ++++                     |
| 3DL1 <sup>high</sup> | Bw4 <sup>strong</sup> | ++++                     |
| 2DL3                 | Cw*12                 | +++                      |
| 2DL3                 | C1 + B*46             | +++                      |
| 2DL1 non*004         | Cw2*02,4,5,6,15 (C2)  | ++                       |
| 3DL1*007             | Bw4 <sup>strong</sup> | ++                       |
| NKG2A                | HLA-E                 | ++                       |
| 2DL1*004             | Cw2*02,4,5,6,15 (C2)  | +                        |
| 2DL3                 | Cw*01,3,8 (C1), 1404  | +                        |
| 3DL1 <sup>high</sup> | B*27                  | +                        |
| 3DL1 <sup>high</sup> | A*24                  | +                        |
| 2DL1                 | Cw*01,3,8, (C1), 1404 | -                        |
| 2DL3                 | Cw*1402               | -                        |
| 2DL3                 | Cw2*02,4,5,6,15 (C2)  | -                        |
| 3DL1 <sup>high</sup> | B*13                  | -                        |
| 3DL1 <sup>high</sup> | B*37                  | -                        |
| 3DS1                 | Bw4 <sup>strong</sup> | -                        |
| 3DL2                 | A*3,11                | -                        |

**References:**

1. Lotze MT, Thomson AW. Natural Killer Cells -Basic Science and Clinical Application. Elsevier, Amsterdam 2009:704.
2. Yawata M, Yawata N, Draghi M, et al. MHC class I-specific inhibitory receptors and their ligands structure diverse human NK-cell repertoires toward a balance of missing self-response. Blood 2008;112:2369-80.

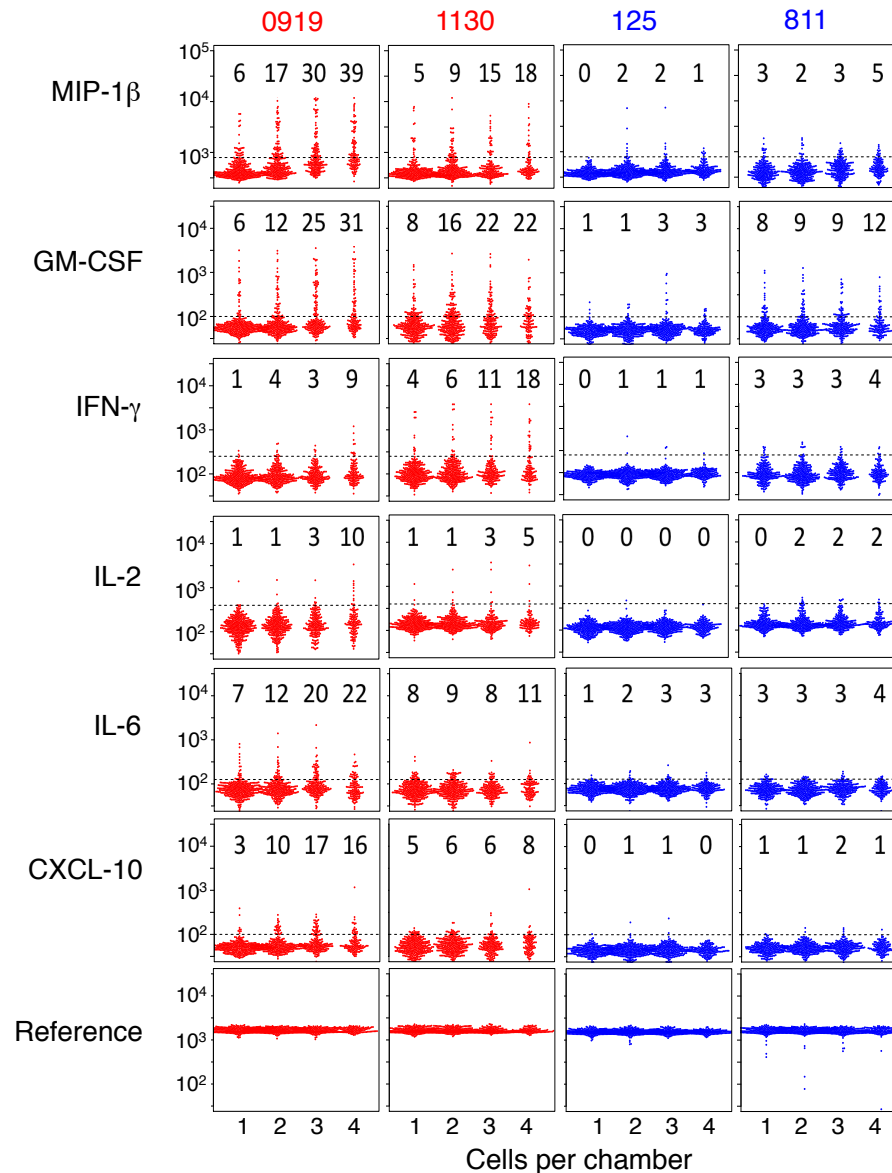

**Supplementary Figure 1. Univariate comparison of NK cell secretions from *HLA-C1C1* and *HLA-C2+* CD patient using SCBC. MIP-1 $\beta$ , GM-CSF, IFN- $\gamma$ , IL-2, IL-6, CXCL-10, and reference signals from 1-4 cell SCBC microchambers from *HLA-C1C1* (#0919, #1130, red) and *HLA-C2+* (#0125, #811, blue) CD patients.**

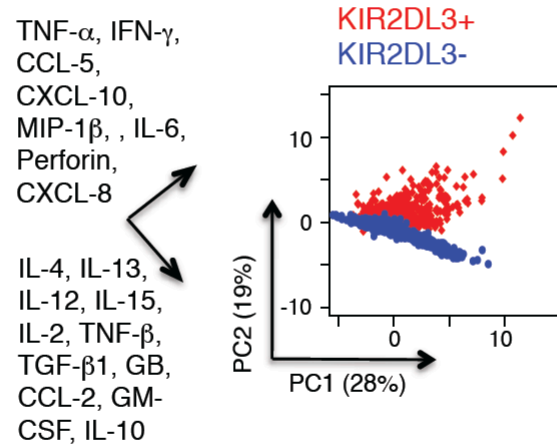

**Supplementary Figure 2. KIR2DL3<sup>+</sup> NK cells from an AA haplotype individual display higher effector protein production capacity than KIR2DL3<sup>-</sup> NK cells.** PCA analysis of NK secretion profiles from KIR2DL3<sup>+</sup> and KIR2DL3<sup>-</sup> NK subsets. Percentage of variation explained by each component is shown in parentheses. The factors for each component are indicated left of the plot.

**A**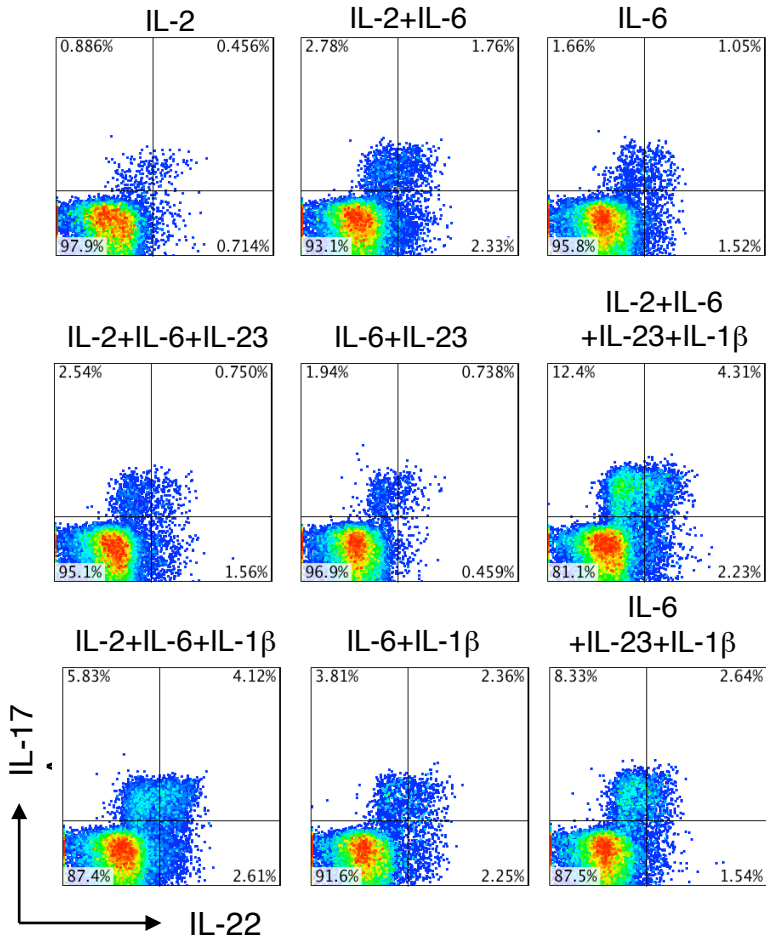**B**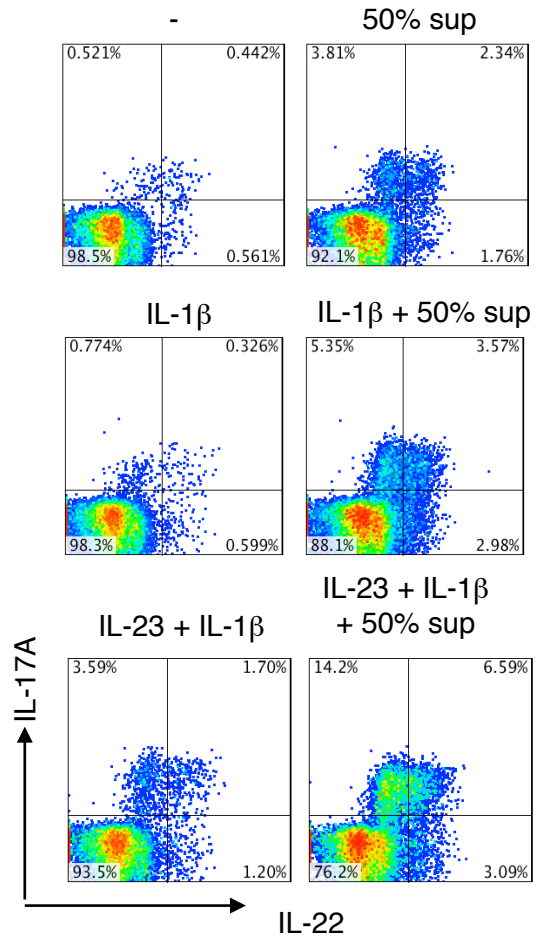**C**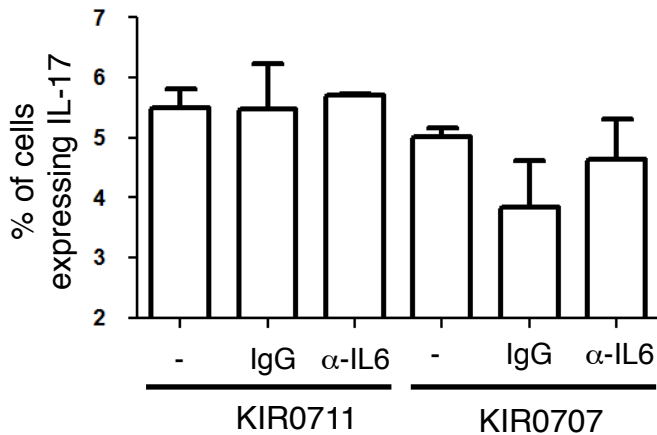

**Supplementary Figure 3. NK cell supernatant from *HLA-C1C1* healthy donor facilitated *in vitro* T<sub>H</sub>17 differentiation.** (A) *in vitro* T<sub>H</sub>17 differentiation in various cytokine combinations. Scatter plot of IL-17A and IFN- $\gamma$  intracellular production from CD4<sup>+</sup> T cells at D14 after differentiation with or without IL-2 at 2 ng mL<sup>-1</sup>, in the presence or absence of IL-1 $\beta$ , IL-23, or IL-6, at 50 ng mL<sup>-1</sup>, as

indicated. (B) Scatter plot of IL-17A and IL-22 intracellular production from CD4<sup>+</sup> T cells at D14 after differentiation with IL-1 $\beta$  or IL-23 and IL-1 $\beta$ , at concentration of 50 ng mL<sup>-1</sup>, with or without the addition of NK cell supernatant. Numbers in each quadrant represents the percentage of cell in that section. (C) Effect of IL-6 depletion (5ug/mL) from 2 *HLA-C1C1* healthy donor NK cell supernatants in T<sub>H</sub>17 differentiation *in vitro*.
